# Supplementary material for: A type IVB pilin influences twitching motility and in vitro adhesion to epithelial cells in Burkholderia pseudomallei
Source: PubMed Central journal article supplement (PMC9558350; doi:10.1099/mic.0.001150), 2022-03-16
Supplement: mic-168-1150-s001.pdf [file mic-168-1150-s001.pdf]

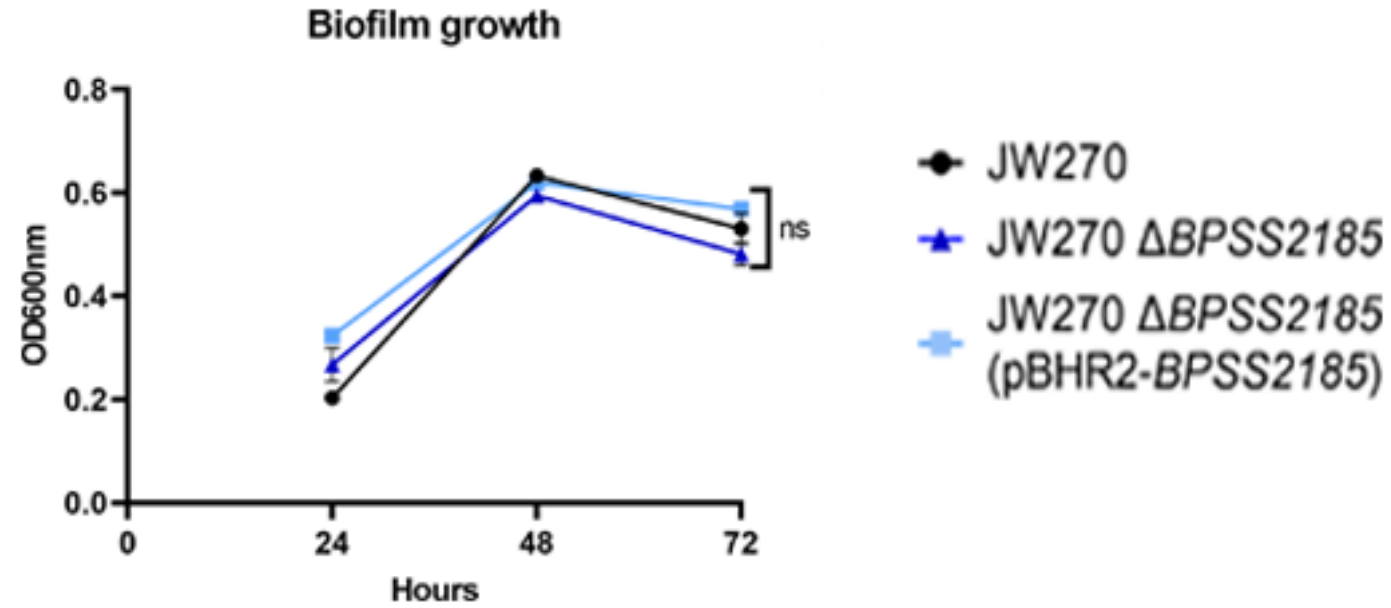

**Figure S1.** Biofilm formation for three *Burkholderia pseudomallei* strains. There was no significant difference in biofilm formed. ns, not significant.

JW270

JW270  $\Delta$ BPSS2185

JW270  $\Delta$ BPSS2185  
(pBHR2-BPSS2185)

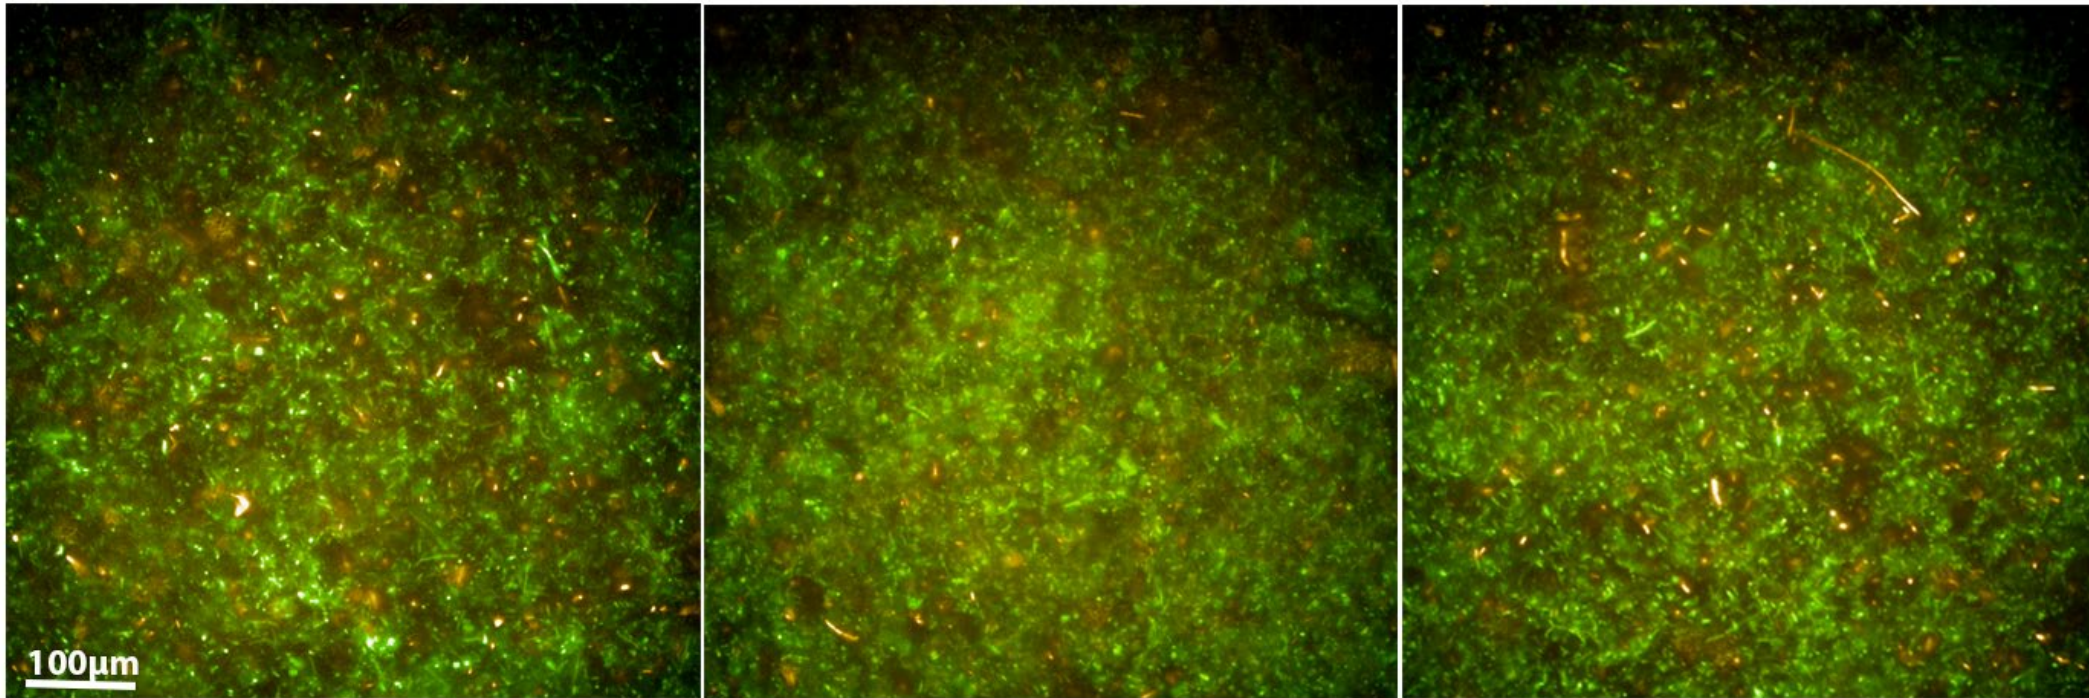

**Figure S2.** Fluorescent microscope images for the cells washed and stained with SYBR green to determine viability of cells after eDNA export in Fig. 5a. A scale bar of 100  $\mu$ m is shown in white at the bottom left.
